# Supplementary material
Source: PubMed Central journal article supplement (PMC9556305)
Supplement: 41591_2022_1919_MOESM1_ESM.pdf [file 41591_2022_1919_MOESM1_ESM.pdf]

---

**Supplementary information**

---

**Pepinemab antibody blockade of SEMA4D  
in early Huntington's disease: a  
randomized, placebo-controlled, phase 2  
trial**

---

In the format provided by the  
authors and unedited

## Supplementary Information

Pepinemab antibody blockade of SEMA4D in early Huntington's Disease: a randomized, placebo controlled, phase 2 trial

Andrew Feigin<sup>1</sup>, Elizabeth E. Evans<sup>2</sup>, Terrence L. Fisher<sup>2</sup>, John E. Leonard<sup>2</sup>, Ernest S. Smith<sup>2</sup>, Alisha Reader<sup>2</sup>, Vikas Mishra<sup>2</sup>, Richard Manber<sup>3</sup>, Kimberly A. Walters<sup>4</sup>, Lisa Kowarski<sup>4</sup>, David Oakes<sup>5</sup>, Eric Siemers<sup>6</sup>, Karl D. Kieburtz<sup>5</sup>, Maurice Zauderer<sup>2</sup>, and the Huntington Study Group SIGNAL investigators \*

Corresponding author: Dr. Maurice Zauderer, Vaccinex, Inc., 1895 Mt. Hope Avenue, Rochester, NY, USA;

[mzauderer@vaccinex.com](mailto:mzauderer@vaccinex.com); (585) 503-5949.

<sup>1</sup>New York University Langone Health, and The Marlene and Paolo Fresco Institute for Parkinson's and Movement Disorders, New York, New York, USA. <sup>2</sup>Vaccinex, Inc., Research, Rochester, New York, USA. <sup>3</sup>IXICO, London, England. <sup>4</sup>WCG Statistics Collaborative, Inc., Washington DC, USA. <sup>5</sup>University of Rochester Medical Center, Rochester, New York, USA. <sup>6</sup>Siemers Integration LLC, Zionsville, Indiana, USA. \*A list of authors and their affiliations appears at the end of the paper.

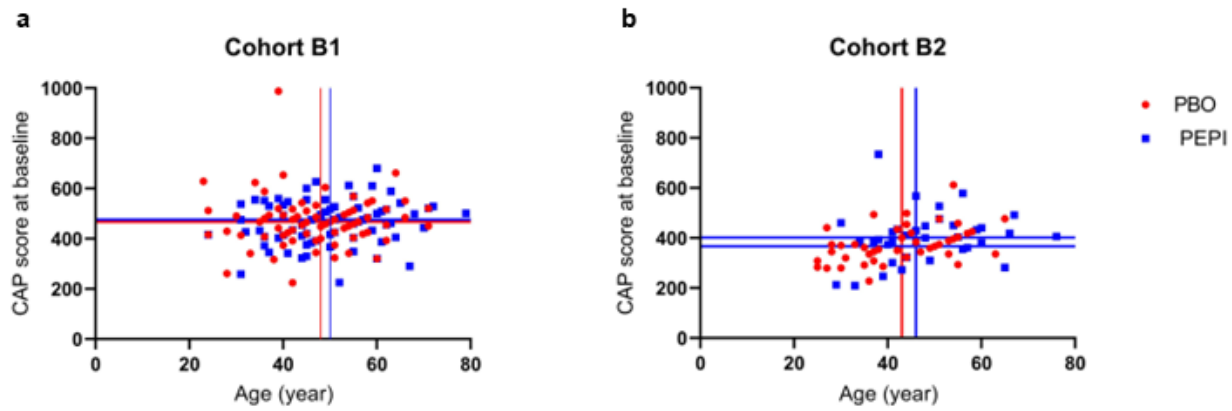

**Supplementary Fig. 1: Baseline CAP scores and age. a. Cohort B1. b. Cohort B2.** The symbols represent pepinemab (PEPI) in blue and placebo (PBO) in red; lines represent median.

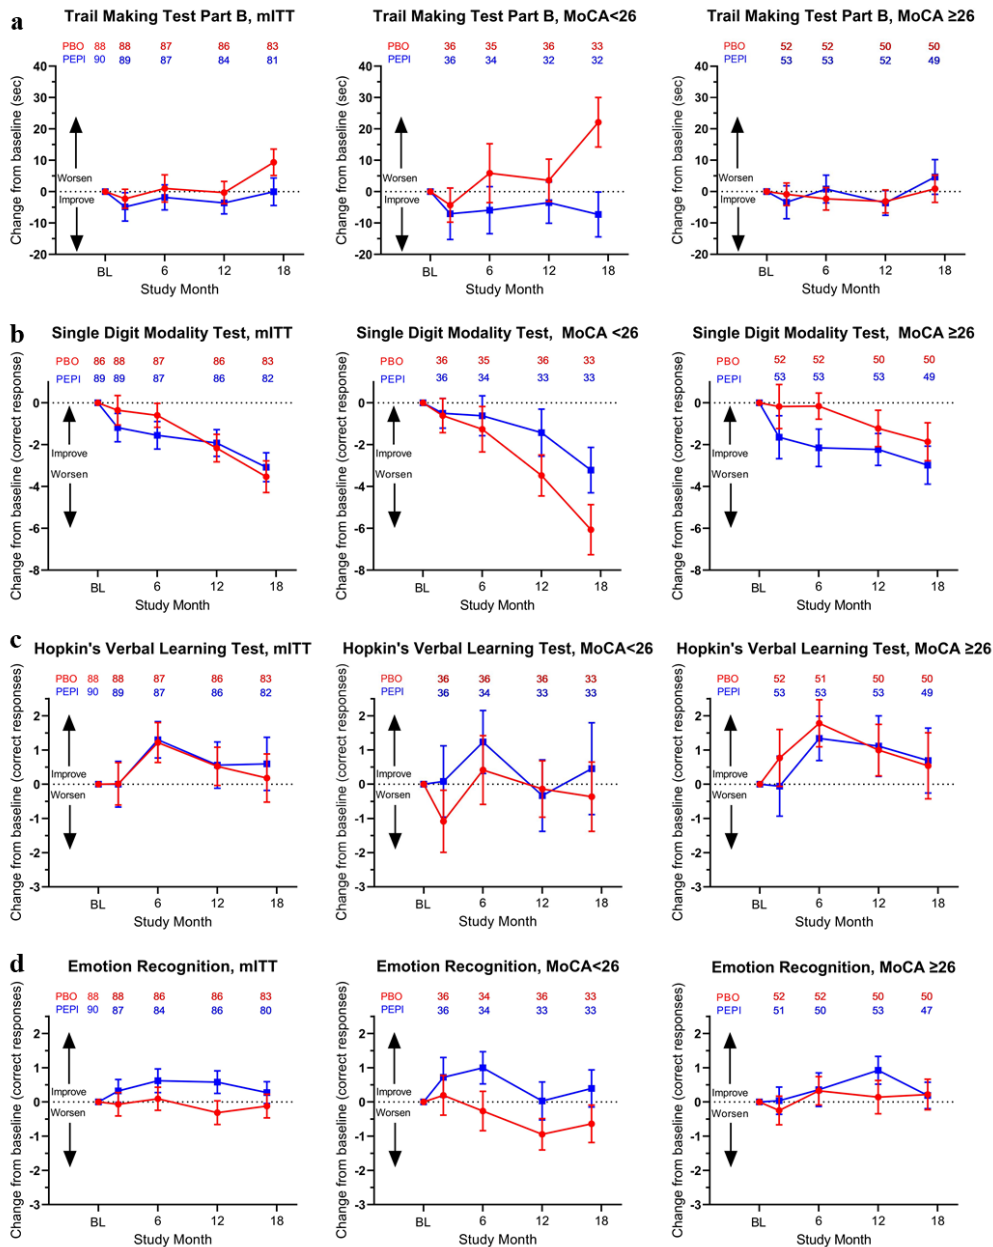

**Supplementary Fig. 2: Post-hoc subgroup analysis of baseline MoCA as a biomarker for treatment response in early HD.** Observed mean changes from baseline by treatment group over time for the EM Cohort B1 stratified by baseline MoCA scores of <26, or 26-30, considered to be normal cognitive function. Assessments of a. Trail making test - part B, b. Single digit modality test, c. Hopkins verbal learning test - revised, and d. Emotion recognition. The error bars in each panel show one standard error on either side of the mean, and the sample sizes at each timepoint for each group are listed above the profile lines. The symbols represent PEPI (blue) and PBO (red).

**Supplementary Table 1: List of study coordinators, medical monitor, and safety monitoring committee**

|                                               |                                                                     |                                                     |
|-----------------------------------------------|---------------------------------------------------------------------|-----------------------------------------------------|
| Study coordinators                            | Candace Cromer & Jenna Smith                                        | University of Alabama at Birmingham, Birmingham, AL |
|                                               | Chase Snell & Jordan Castleton                                      | UCSD, San Diego, CA                                 |
|                                               | Julia Glueck                                                        | UCSF, San Francisco, CA                             |
|                                               | Erin Clark & Mary Cook                                              | University of Colorado, Aurora, CO                  |
|                                               | Hope Heller, Erin Koppel, & Robin Kuprewicz                         | Georgetown University, Washington DC                |
|                                               | Kyle Rizer                                                          | University of Florida Gainesville, Gainesville, FL  |
|                                               | Elaine Sperin                                                       | Emory University, Atlanta, GA                       |
|                                               | Owen Wade                                                           | University of Iowa, Iowa City, IA                   |
|                                               | Andrea Hurt                                                         | Indiana University, Bloomington, IN                 |
|                                               | Annette Robinson                                                    | University of Louisville, Louisville, KY            |
|                                               | Jacqueline Fung, Noah Allanoff, & Wilanda Gabriel                   | Beth Israel Deaconess Medical Center, Boston, MA    |
|                                               | Courtney Jordan & Natilie Conners                                   | Massachusetts General Hospital, Boston, MA          |
|                                               | Mollie Jenkes                                                       | John's Hopkins University, Baltimore, MD            |
|                                               | Angela Stovall & Michael Hadden                                     | University of Michigan, Ann Arbor, MI               |
|                                               | Melissa Ammel                                                       | Washington University, St. Louis, MO                |
|                                               | Kate Beck & Lisa Gauger                                             | Duke University, Durham, NC                         |
|                                               | Summer Harris                                                       | Wake Forest University, Winston-Salem, NC           |
|                                               | Amy Chesire                                                         | University of Rochester, Rochester, NY              |
|                                               | Paula Wasserman                                                     | Columbia University, New York, NY                   |
|                                               | Brandi Crews                                                        | University of Cincinnati, Cincinnati, OH            |
|                                               | Allison Daley & Katherine Ambrogi                                   | Ohio State University, Columbus, OH                 |
|                                               | Kristen Schuchmann, Julia Spears, Nancy Vollmar, & Stephanie Wilson | University of Toledo, Toledo, OH                    |
|                                               | Danielle Buchanan                                                   | Vanderbilt University, Nashville, TN                |
| Brittany Duncan & Jamie Sims                  | University of Texas Houston, Houston, TX                            |                                                     |
| Kelly Huckstep, Heather Ward, & Ginger Norris | Virginia Commonwealth University, Richmond, VA                      |                                                     |
| Emily Houston                                 | University of Vermont, South Burlington, VT                         |                                                     |
| Debra Del Castillo                            | University of Washington, Seattle, WA                               |                                                     |
| Paul McCann                                   | University of Alberta, Edmonton, AL                                 |                                                     |
| Mike Adurogbangba & Joji Decolongon           | University of British Columbia, Vancouver, BC                       |                                                     |
| Martine Comeau & Marie Martin                 | CHUM, Montreal, QB                                                  |                                                     |
| Medical Monitor                               | Martin Niethammer                                                   | North Shore University Hospital, Great Neck, NY     |
| Safety Monitoring Committee                   | Michael McDermott                                                   | University of Rochester, Rochester, NY              |
|                                               | Timothy Greenamyre                                                  | University of Pittsburgh, Pittsburgh, PA            |
|                                               | Donald Higgins                                                      | Samuel S. Stratton VA Medical Center, Albany, NY    |
